# Supplementary material
Source: HighWire-hosted journal article supplement (https://bmjopenquality.bmj.com/content/6/2/e000023)
Supplement: inline-supplementary-material-1 [file inline-supplementary-material-1.docx]

|  | Lewisham  n=9 | Croydon  n = 3 | Lambeth  n = 6 |
| --- | --- | --- | --- |
| How adequate is current handover system overall?  1 = inadequate,  5 = adequate | 1 - 3 (33%)  2 - 1 (11%)  3 - 4 (44%)  4 - 1 (11%)  5 - 0 (0%) | 1 - 0 (0%)  2 - 0 (0%)  3 - 3 (100%)  4 - 0 (0%)  5 - 0 (0%) | 1 - 2 (33%)  2 - 4 (66%)  3 - 0 (0%)  4 - 0 (0%)  5 - 0 (0%) |
| How easy is it to ascertain outstanding jobs?  1 = very difficult,  5- very easy | 1 - 0 (0%)  2 - 4 (44%)  3 - 3 (33%)  4 - 1 (11%)  5 - 1 (11%) | 1 - 0 (0%)  2 - 3 (33%)  3 - 3 (33%)  4 - 3 (33%)  5 - 0 (0%) | 1 - 2 (33%)  2 - 1 (17%)  3 - 2 (33%)  4 - 1 (17%)  5 - 0 (0%) |
| How important is it to have a handover system?  1= not important,  5 = very important | 1 - 0 (0%)  2 - 0 (0%)  3 - 0 (0%)  4 - 0 (0%)  5 - 9 (100%) | 1 - 0 (0%)  2 - 0 (0%)  3 - 0 (0%)  4 - 0 (0%)  5 - 3 (100%) | 1- 0 (0%)  2 - 0 (0%)  3 - 0 (0%)  4 - 2 (33%)  5 - 4 (66%) |
| What form should the handover take?  verbal = 1  email = 2  brief entry =3  brief discharge summary = 4 | 1 - 3 (37.5%)  2 - 0 (0%)  3 - 5 (62.5%)  4 - 0 (0%) | 1 - 0 (0%)  2 - 1 (33%)  3 - 2 (67%)  4 - 0 (0%) | 1 - 0 (0%)  2 - 1 (17%)  3 - 2 (67%)  4 - 1 (17%) |

|  |
| --- |

|  |
| --- |

|  |  |  |  |  |  |  |
| --- | --- | --- | --- | --- | --- | --- |
| **Pre intervention SI data** (01/10/2014-31/03/15) |  |  |  |  |  |  |
|  |  |  |  |  |  |  |
|  |  |  |  |  |  |  |
| TYPE | A - Death | B - Severe | C - Moderate | D - Low | E - No Adverse Outcome | Total |
| Violence/Aggression/Assault | 0 | 3 | 55 | 128 | 42 | 228 |
| **Clinical Care (Inc.Substance Misuse/Pressure Ulcer/Wound)** | 0 | 1 | 31 | 29 | 17 | **78** |
| Medication | 0 | 0 | 6 | 1 | 2 | 9 |
| Self-Harm | 0 | 1 | 4 | 8 | 3 | 16 |
| Death | 1 | 0 | 0 | 0 | 0 | 1 |
| Patient Accidents/Health & Safety/Fire | 0 | 0 | 5 | 19 | 11 | 35 |
| Staff Accidents/Health & Safety/Fire | 0 | 0 | 3 | 3 | 0 | 6 |
| Security | 0 | 0 | 6 | 9 | 7 | 22 |
| Confidentiality/IT/Health Records | 0 | 0 | 0 | 2 | 4 | 6 |
| MHA Breach | 0 | 0 | 2 | 1 | 2 | 5 |
| Staff Issues | 0 | 0 | 1 | 22 | 9 | 32 |
| Total | 1 | 5 | 113 | 222 | 97 | 438 |
